# Supplementary material for: Energetic optimization of thermochemical air separation for the production of sustainable nitrogen
Source: Royal Society of Chemistry journal article supplement (doi:10.1039/d3re00087g), 2023-01-01
Supplement: d3re00087g1.pdf [file d3re00087g1.pdf]

# Supporting Information: Energetic optimization of thermochemical air separation for the production of sustainable nitrogen

## 1 Thermodynamic properties

Thermodynamic properties of the materials investigated are summarized in table 1. The values of  $\text{Ca}_{1-x}\text{Sr}_x\text{MnO}_{3-\delta}$  are extracted from<sup>1</sup> with a linear approximation. The original data was collected via the van't Hoff approach of thermogravimetric measurements.

**Table 1** Thermodynamic properties of the materials investigated.

| Material                                               | $\Delta h_{\delta}^{\circ}$<br>[kJmol <sup>-1</sup> ] | $\Delta s_{\delta}^{\circ}$<br>[Jmol <sup>-1</sup> K <sup>-1</sup> ] | $a$<br>[-] | extracted from |
|--------------------------------------------------------|-------------------------------------------------------|----------------------------------------------------------------------|------------|----------------|
| SrFeO <sub>3-δ</sub>                                   | 74                                                    | 47                                                                   | 1.07       | 2              |
| Sr <sub>0.8</sub> Ca <sub>0.2</sub> FeO <sub>3-δ</sub> | 57.5                                                  | -                                                                    | -          | 3              |
| CaMnO <sub>3-δ</sub>                                   | 180                                                   | 108                                                                  | 1          | 1              |
| Ca <sub>0.9</sub> Sr <sub>0.1</sub> MnO <sub>3-δ</sub> | 168                                                   | 100                                                                  | 1          | 1              |
| Ca <sub>0.8</sub> Sr <sub>0.2</sub> MnO <sub>3-δ</sub> | 157                                                   | 92                                                                   | 1          | 1              |
| Ca <sub>0.7</sub> Sr <sub>0.3</sub> MnO <sub>3-δ</sub> | 146                                                   | 84                                                                   | 1          | 1              |
| Ca <sub>0.6</sub> Sr <sub>0.4</sub> MnO <sub>3-δ</sub> | 135                                                   | 76                                                                   | 1          | 1              |

## 2 Calculation of pressure drop $\Delta p$

The pressure drop  $\Delta p$  during oxidation and reduction at 1 bar is calculated based on the Ergun equation<sup>4</sup>. The necessary input values are listed in the following:

length of the packed bed  $\Delta L$  : 500 mm

fluid velocity in the empty pipe  $v$  : 0.422  $\frac{\text{m}}{\text{s}}$

porosity of the filling  $\psi$  : 0.4

Sauter particle diameter  $d$  : 1.5 mm

The temperature and pressure dependent dynamic viscosity and fluid density are summarized in table 2 and 3. These values are calculated based on the material properties of air extracted from<sup>5</sup>.

**Table 2** Dynamic viscosity  $\eta$  in  $\frac{\text{kg}}{\text{ms}}$  calculated for the applied temperatures and pressures during oxidation and reduction.

|                |   | Temperature [K] |       |       |       |       |       |
|----------------|---|-----------------|-------|-------|-------|-------|-------|
|                |   | 623             | 873   | 973   | 1023  | 1173  | 1223  |
| pressure [bar] | 1 | 316.5           | 398.0 | 427.9 | 442.4 | 484.6 | 498.4 |
|                | 2 | 316.8           |       | 427.7 | 442.1 |       |       |
|                | 3 | 316.8           |       | 427.7 | 442.1 |       |       |
|                | 4 | 316.8           |       | 427.7 | 442.1 |       |       |
|                | 5 | 317.1           |       | 427.6 | 441.9 |       |       |

**Table 3** Fluid density of air in  $\frac{\text{kg}}{\text{m}^3}$  calculated for the applied temperatures and pressures during oxidation and reduction.

|                |   | Temperature [K] |       |       |       |      |       |
|----------------|---|-----------------|-------|-------|-------|------|-------|
|                |   | 623             | 873   | 973   | 1023  | 1173 | 1223  |
| pressure [bar] | 1 | 0.56            | 0.398 | 0.358 | 0.341 | 0.3  | 0.288 |
|                | 2 | 1.092           |       | 0.728 | 0.702 |      |       |
|                | 3 | 1.626           |       | 1.097 | 1.060 |      |       |
|                | 4 | 2.161           |       | 1.465 | 1.418 |      |       |
|                | 5 | 2.691           |       | 1.873 | 1.782 |      |       |

The resulting pressure drop  $\Delta p$  is listed in the following table.

**Table 4** Pressure drop  $\Delta p$  in bar. Calculated for the applied temperatures and pressures during oxidation and reduction.

|                |   | Temperature [K] |        |        |        |        |        |
|----------------|---|-----------------|--------|--------|--------|--------|--------|
|                |   | 623             | 873    | 973    | 1023   | 1173   | 1223   |
| pressure [bar] | 1 | 0.0143          | 0.0248 | 0.0295 | 0.0319 | 0.0395 | 0.0423 |
|                | 2 | 0.0073          |        | 0.0145 | 0.0155 |        |        |
|                | 3 | 0.0049          |        | 0.0096 | 0.0103 |        |        |
|                | 4 | 0.0037          |        | 0.0072 | 0.0077 |        |        |
|                | 5 | 0.0030          |        | 0.0057 | 0.0060 |        |        |

### 3 Material composition of SrFeO<sub>3- $\delta$</sub> granules

The material composition of the SrFeO<sub>3- $\delta$</sub>  granules was studied with powder X-ray diffraction (XRD) using a *D8-Advance (A25)* instrument from *Bruker* with a cobalt

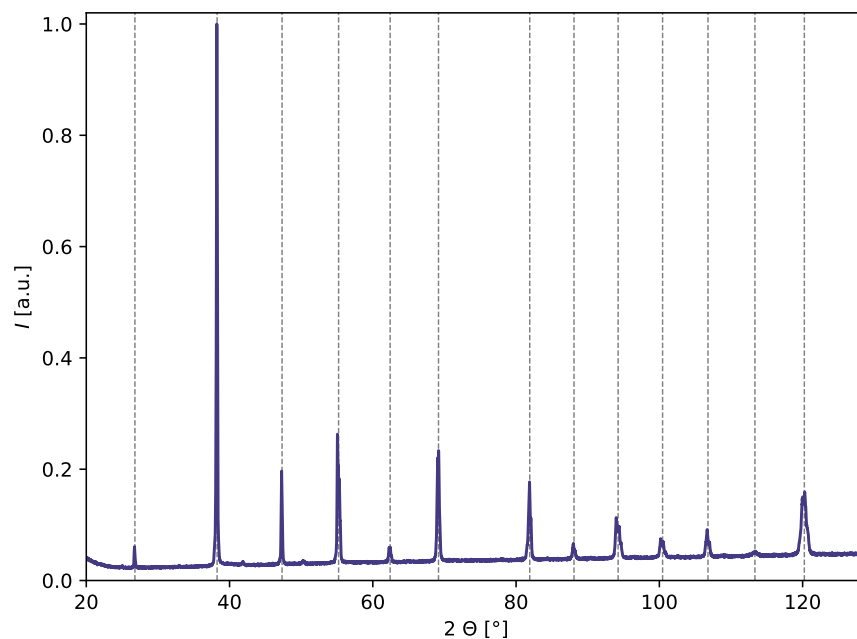

**Figure 1** XRD-pattern of the  $\text{SrFeO}_{3-\delta}$  granules. This pattern was measured with a cobalt anode. The vertical lines indicate the main peaks of the structure with which this pattern was identified. They refer to PDF 01-081-9514 of the database *PDF 2 - Release 2019 RDB* of the *International Center for Diffraction Data (ICCD)*.

anode and a *Lynxe-EyeXET-Detector* (fig.1).

The figure 1 shows that the granules prepared are  $\text{SrFeO}_{3-\delta}$  granules without major side phases. The vertical lines indicate the peak positions of the PDF 01-081-9514 of the database *PDF 2 - Release 2019 RDB* of the *International Center for Diffraction Data (ICCD)*.

## 4 Additional graphs for parametric study

The figures 2 and 3 display both graphs of fig. 6d in the main manuscript separately.

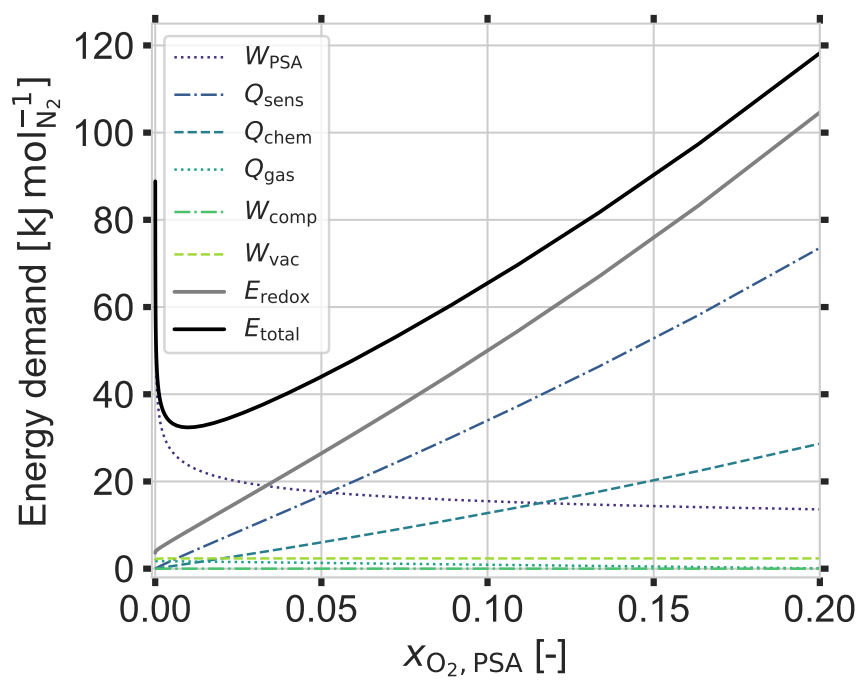

**Figure 2** Variation of the PSA output oxygen  $x_{O_2}$  mole fraction and thus of the oxygen partial pressure during oxidation for  $Sr_{0.8}Ca_{0.2}FeO_{3-\delta}$ .

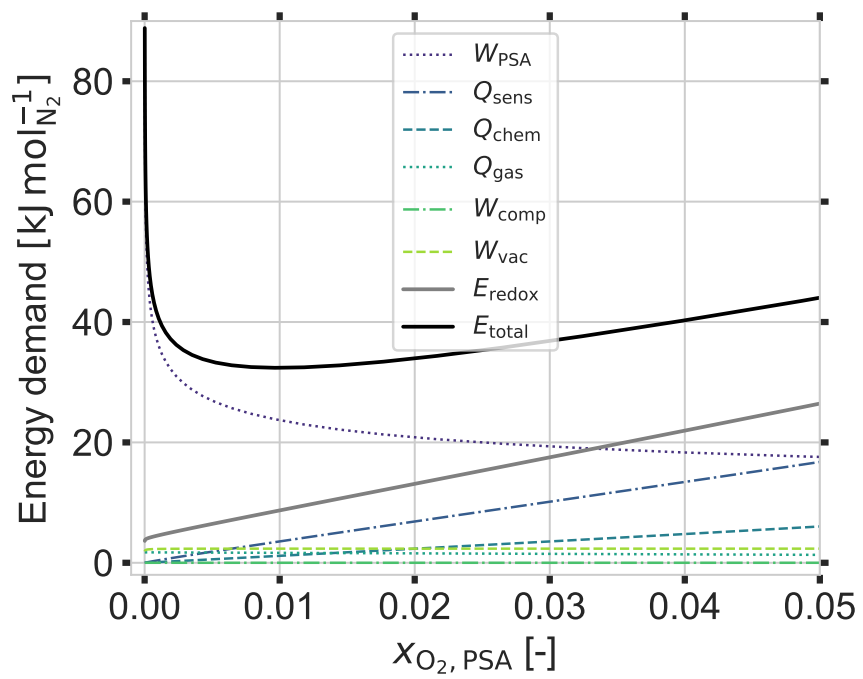

Figure 3 Extract from fig. 2.

## References

- [1] L. Klaas, B. Bulfin, D. Kriechbaumer, M. Roeb and C. Sattler, *Physical Chemistry Chemical Physics*, 2023, **25**, 9188–9197.
- [2] J. Vieten, B. Bulfin, D. E. Starr, A. Hariki, F. M. F. de Groot, A. Azarpira, C. Zachäus, M. Hävecker, K. Skorupska, N. Knoblauch, M. Schmücker, M. Roeb and C. Sattler, *Energy Technology*, 2018, **7**, 131–139.
- [3] S. Capstick, B. Bulfin, J. Naik, M. Gigantino and A. Steinfeld, *Chemical Engineering Journal*, 2023, **452**, 139289.
- [4] S. Ergun, *Chemical Engineering Progress*, 1952, **48**, 89–94.
- [5] V. D. I.-G. V. und Chemieingenieurwesen (GVC), *VDI-Wärmeatlas (VDI-Buch)*, Springer, 2005, p. 1500.
